# Supplementary material for: Thermoresponsive oligo(ethylene glycol) methyl ether methacrylate based copolymers: composition and comonomer effect
Source: Royal Society of Chemistry journal article supplement (doi:10.1039/d1py01688a), 2022-01-01
Supplement: d1py01688a1.pdf [file d1py01688a1.pdf]

**Supplementary information: Thermoresponsive Oligo(ethylene glycol) Methyl Ether Methacrylate based Copolymers: Composition and Comonomer Effect**

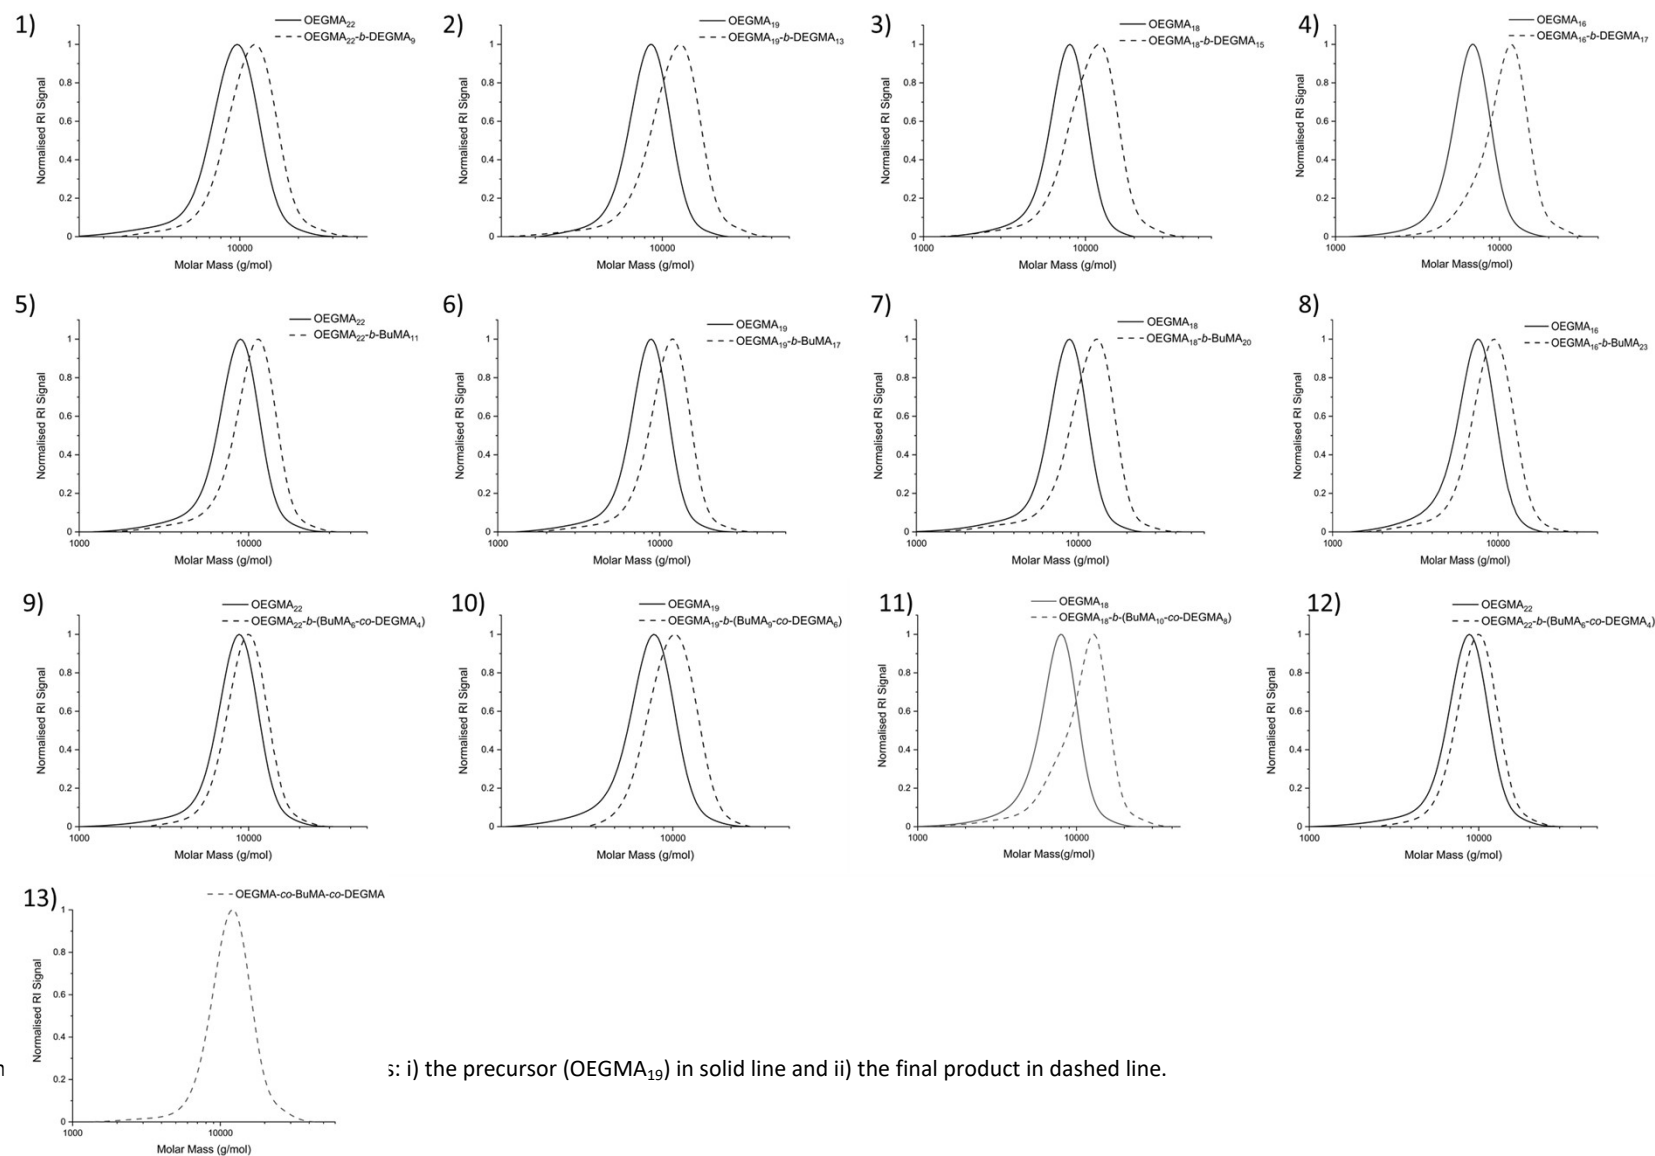

**Figure S 1** Gel permeation

chromatograms showing the reaction progress of various OEGMA precursors with different monomers. s: i) the precursor (OEGMA<sub>19</sub>) in solid line and ii) the final product in dashed line.

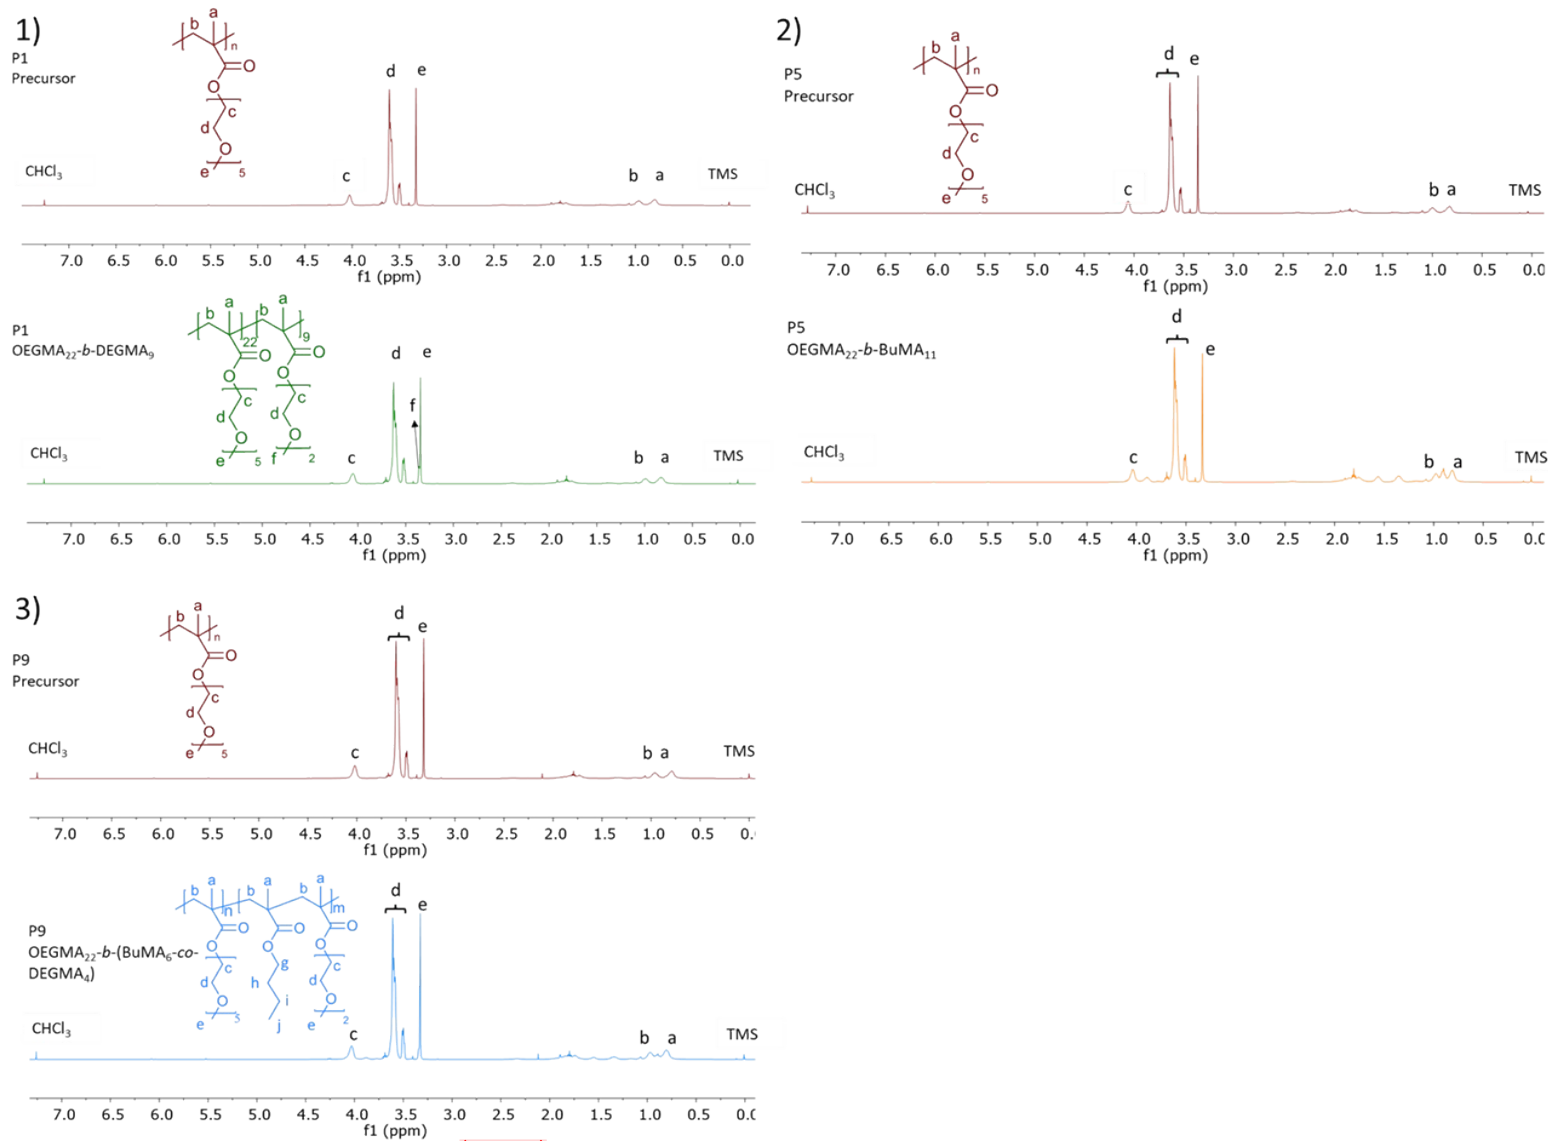

**Figure S 2** <sup>1</sup>H-NMR spectra of Polymer 1, 5 and 9 and their precursors.

**Comment [CA]:** Why QL-C-P1? I know that this is for Qian Li C polymer series, but for the paper, this is irrelevant. Perhaps just delete and keep the number of polymer only to prevent confusion to the audience.

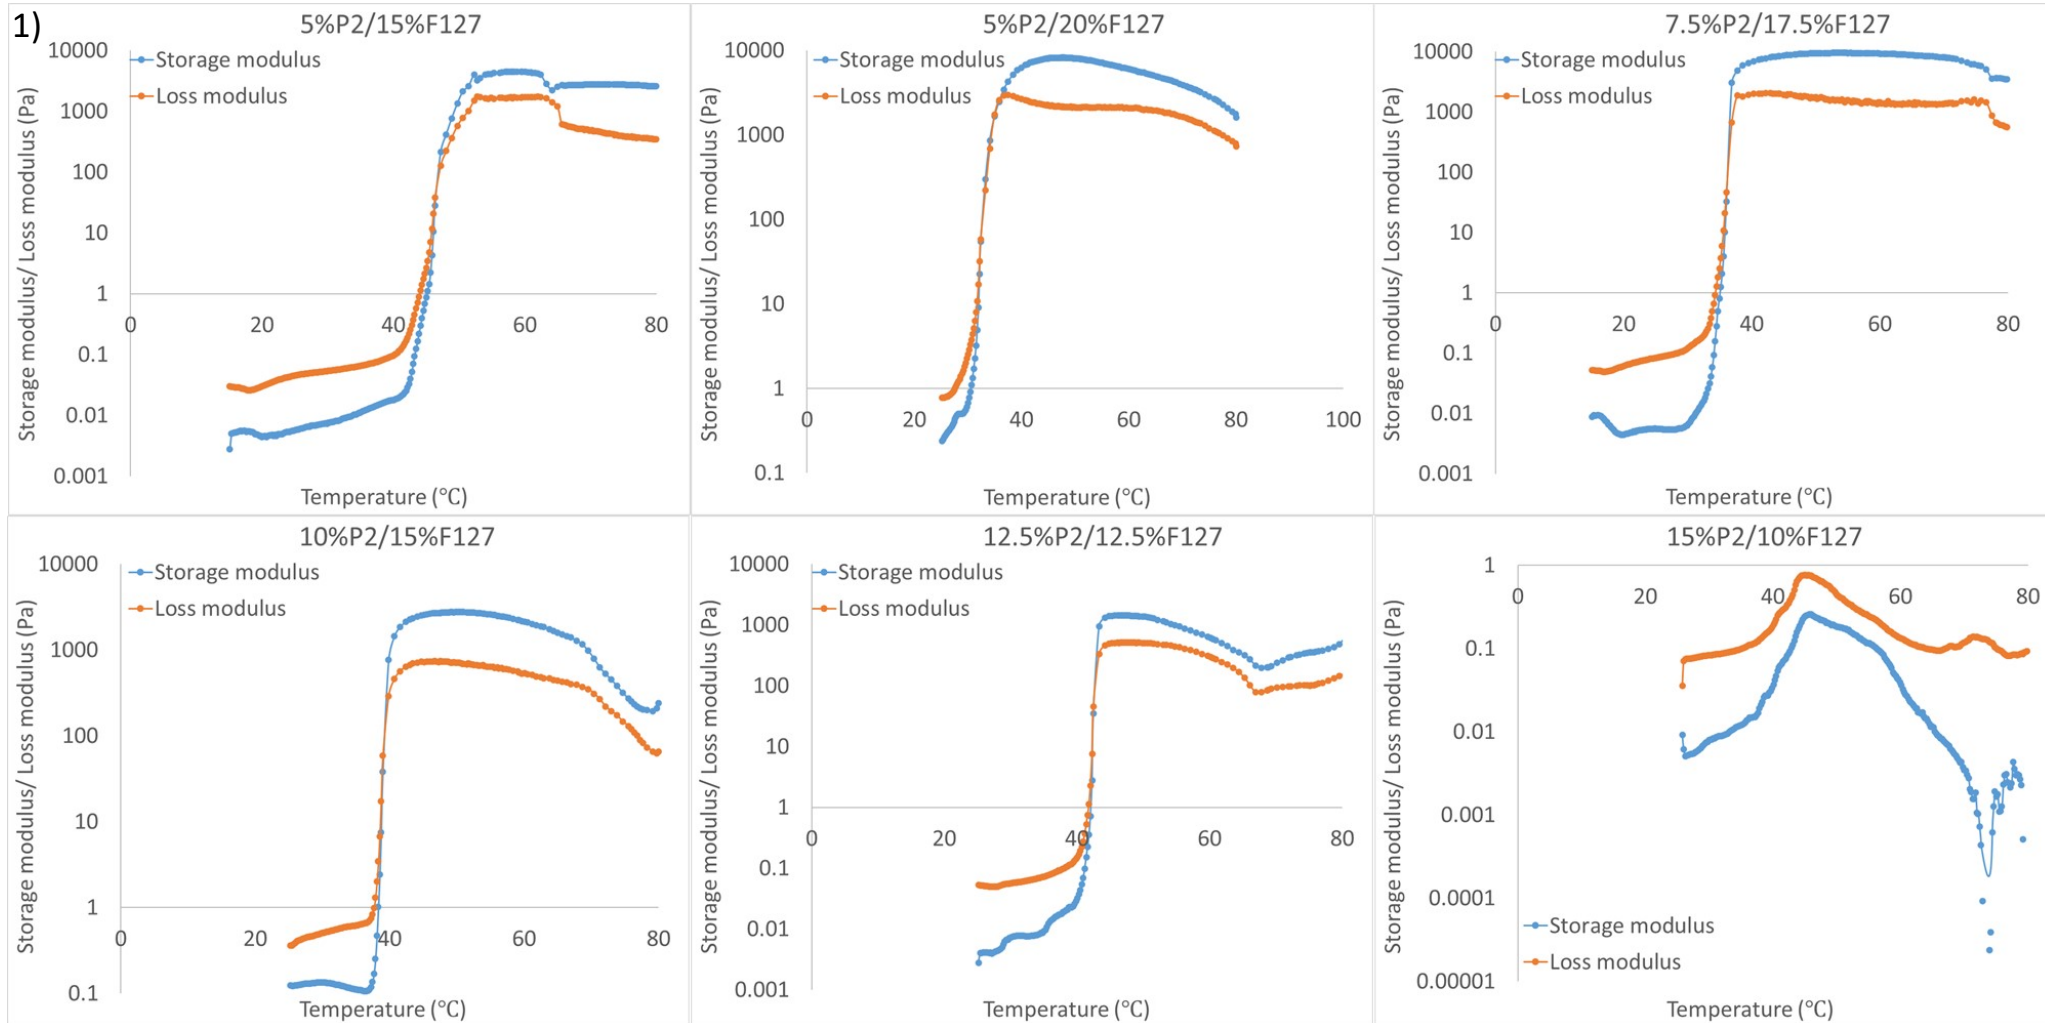

2)

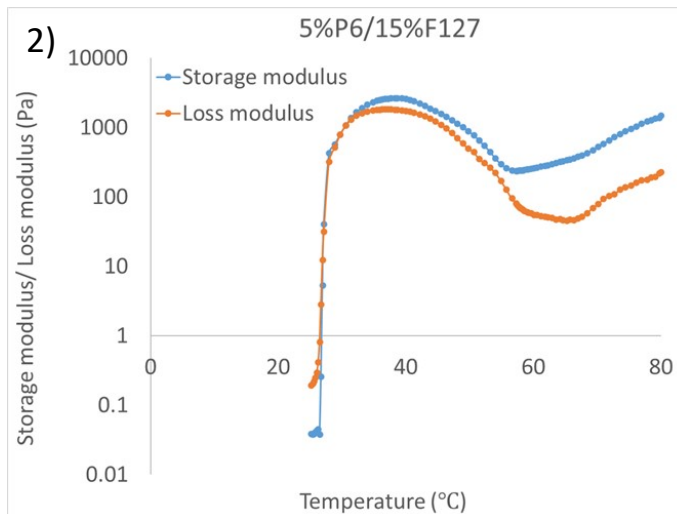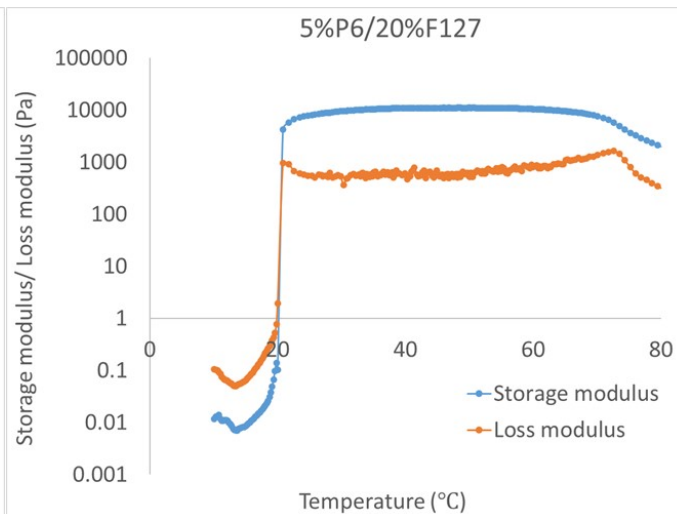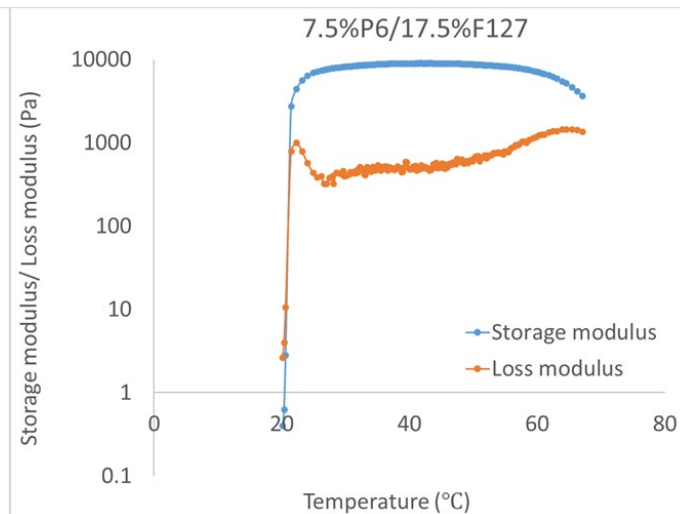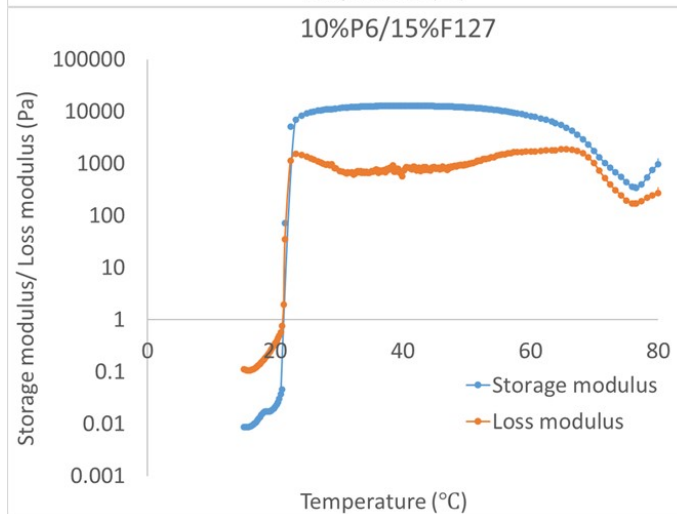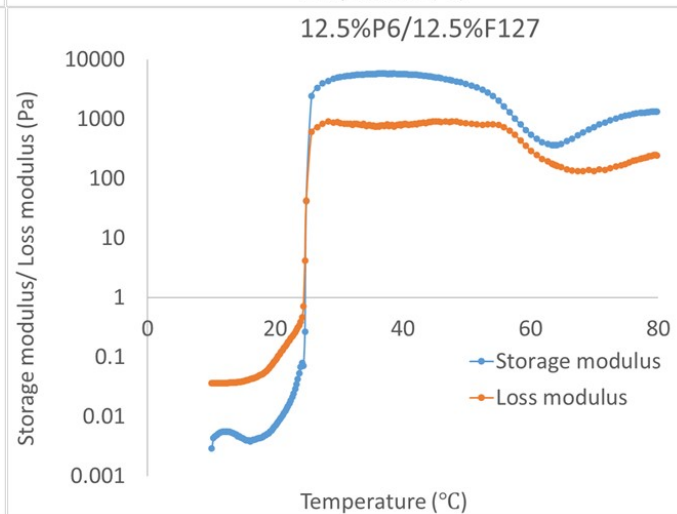

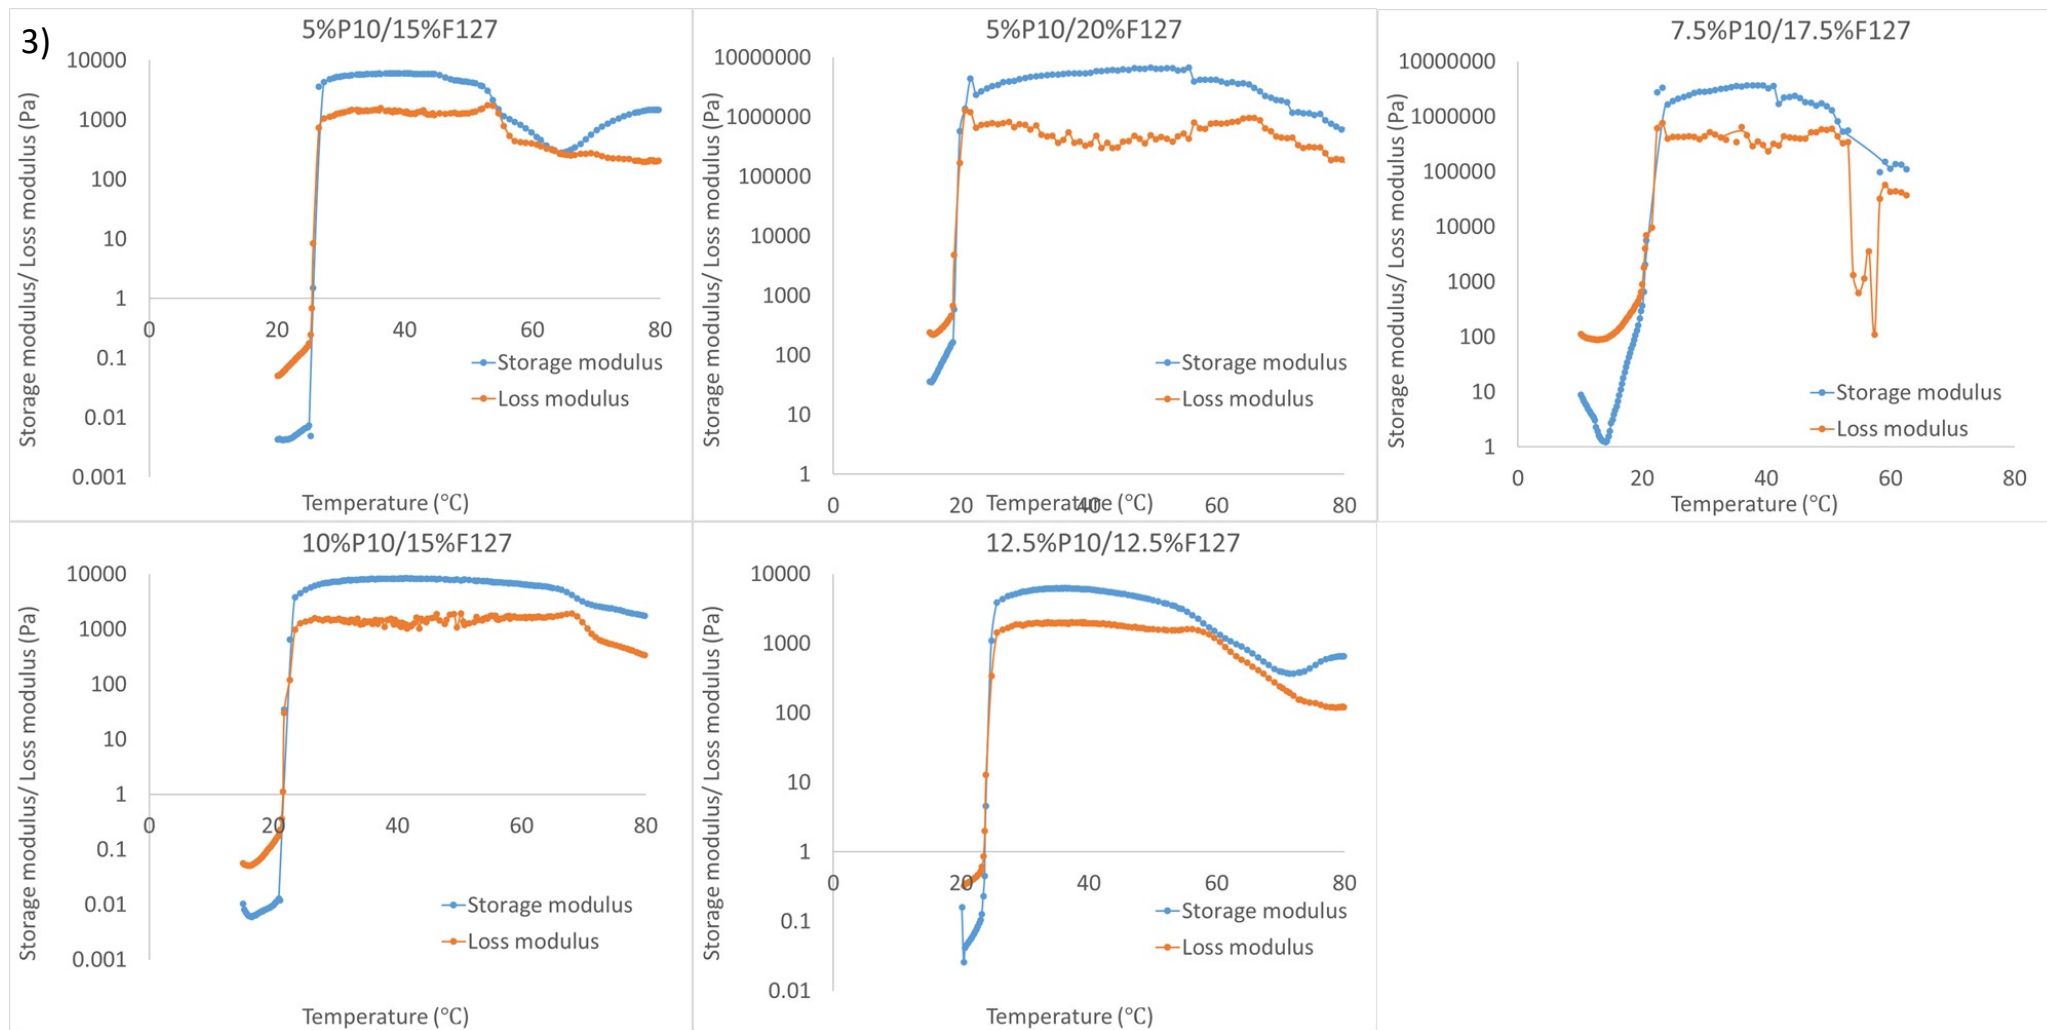

**Figure S3** Rheological results of temperature ramp measurements performed on mixtures of 1)  $\text{OEGMA}_{19}\text{-b-DEGMA}_{13}$  (P2); 2)  $\text{OEGMA}_{19}\text{-b-BuMA}_{17}$  (P6); 3)  $\text{OEGMA}_{19}\text{-b-(BuMA}_9\text{-co-DEGMA}_6)$  (P10) and F127 solutions in DI water at a total concentration of 25 % w/w. The shear storage modulus (elastic modulus,  $G'$ ) and the shear loss modulus (viscous modulus,  $G''$ ) are shown in blue and orange, respectively.

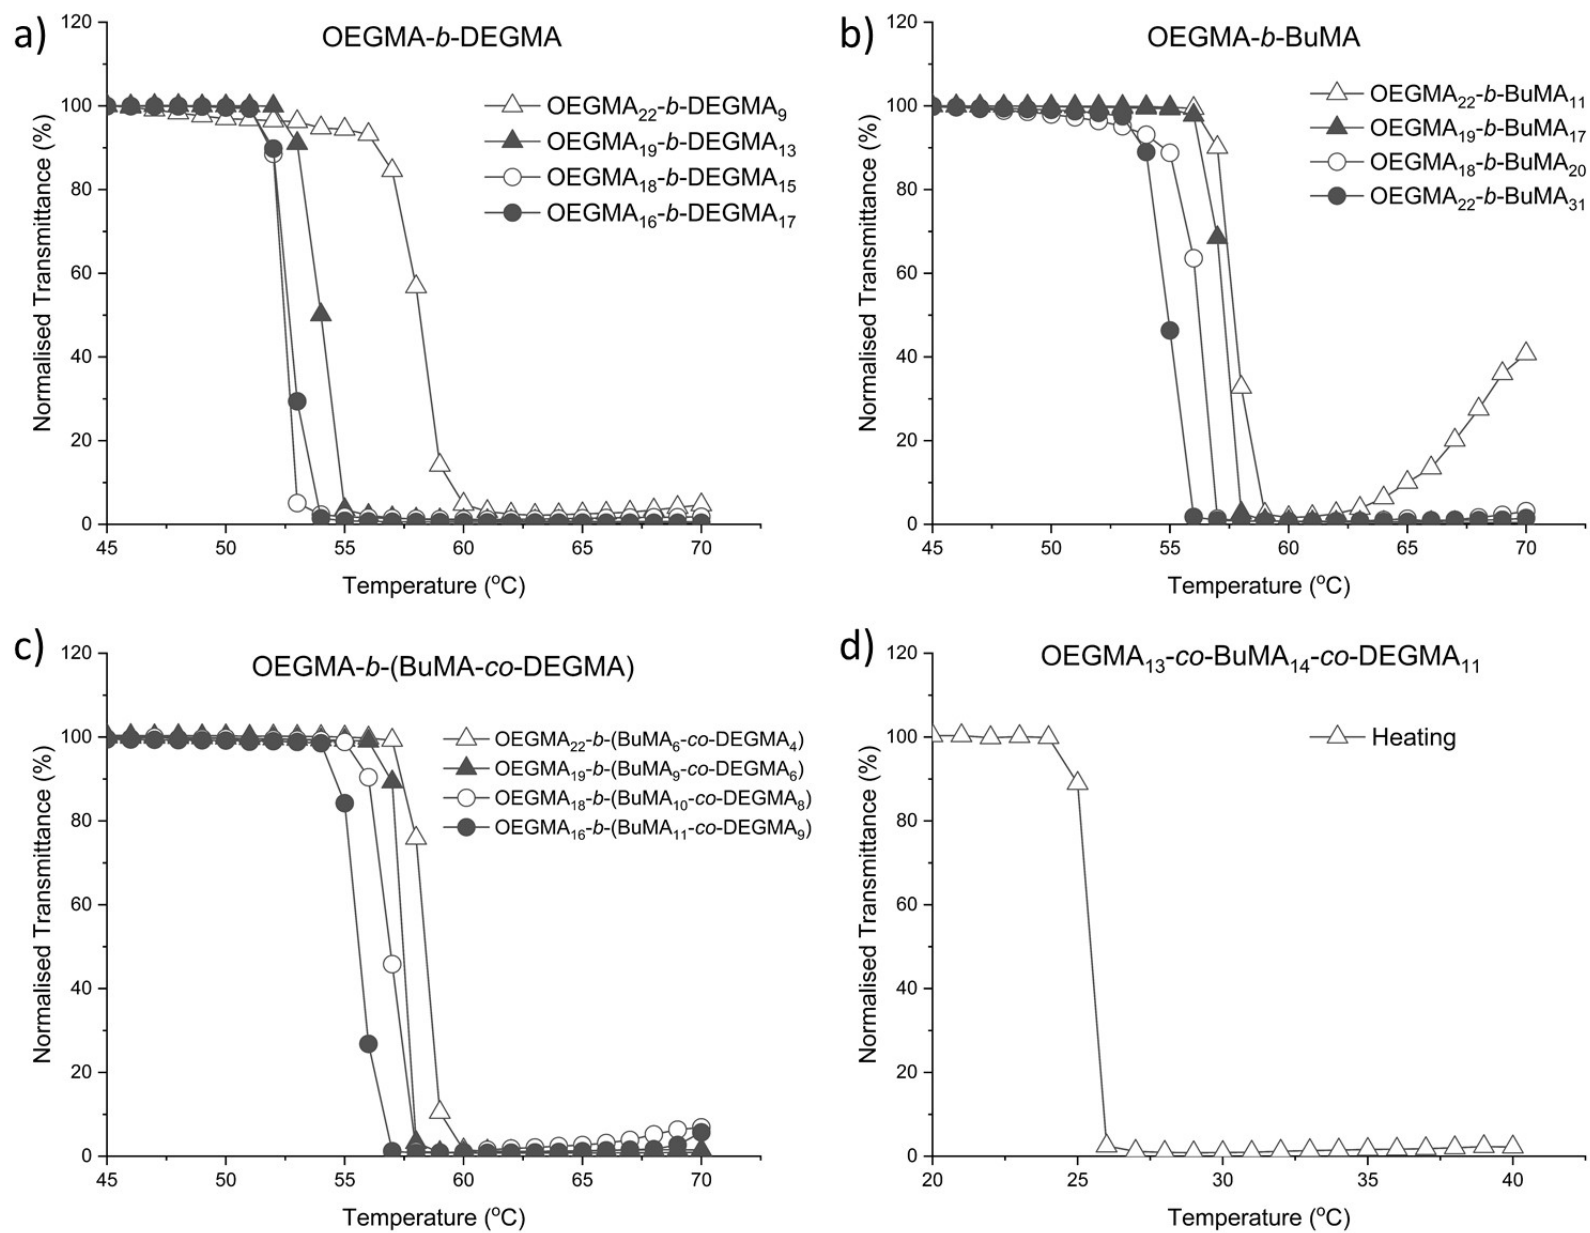

**Figure S 4** Heating curves of a) OEGMA-*b*-DEGMA; b) OEGMA-*b*-BuMA; c) OEGMA-*b*-(BuMA-*co*-DEGMA); and d) OEGMA<sub>13</sub>-*co*-BuMA<sub>14</sub>-*co*-DEGMA<sub>11</sub>.

**Table S1** The gelation temperatures of the mixtures of Pluronic®F127 and copolymers with a constant total concentration (25% w/w).

| Concentration of pluronic / copolymer (wt%) | T <sup>a</sup> <sub>gel</sub> (±2°C)                |     |                                                    |     |                                                                                      |     |
|---------------------------------------------|-----------------------------------------------------|-----|----------------------------------------------------|-----|--------------------------------------------------------------------------------------|-----|
|                                             | PEGMA <sub>19</sub> - <i>b</i> -DEGMA <sub>13</sub> |     | PEGMA <sub>19</sub> - <i>b</i> -BuMA <sub>17</sub> |     | PEGMA <sub>19</sub> - <i>b</i> -(BuMA <sub>9</sub> - <i>co</i> -DEGMA <sub>6</sub> ) |     |
| 5/20                                        | N/A                                                 | N/A | N/A                                                | N/A | N/A                                                                                  | N/A |
| 10/15                                       | 42                                                  | 44  | N/A                                                | N/A | N/A                                                                                  | N/A |
| 12.5/12.5                                   | 39                                                  | 40  | 26                                                 | 25  | 24                                                                                   | 25  |
| 15/10                                       | 37                                                  | 38  | 22                                                 | 21  | 23                                                                                   | 23  |
| 17.5/7.5                                    | 34                                                  | 35  | 22                                                 | 21  | 21                                                                                   | 21  |
| 20/5                                        | 31                                                  | 32  | 21                                                 | 20  | 21                                                                                   | 21  |

<sup>a</sup>The left column is the result of the visual test; the right column is the result of the rheological measurement.

**Table S2.** The gelation temperatures of the mixtures of 20 wt% Pluronic®F127 and 5% w/w of copolymers.

| Concentration of pluronic (wt%) | T <sup>a</sup> <sub>gel</sub> (°C)                  |     |                                                    |     |                                                                                      |     |
|---------------------------------|-----------------------------------------------------|-----|----------------------------------------------------|-----|--------------------------------------------------------------------------------------|-----|
|                                 | PEGMA <sub>19</sub> - <i>b</i> -DEGMA <sub>13</sub> |     | PEGMA <sub>19</sub> - <i>b</i> -BuMA <sub>17</sub> |     | PEGMA <sub>19</sub> - <i>b</i> -(BuMA <sub>9</sub> - <i>co</i> -DEGMA <sub>6</sub> ) |     |
| 5                               | N/A                                                 | N/A | N/A                                                | N/A | N/A                                                                                  | N/A |
| 10                              | N/A                                                 | N/A | N/A                                                | N/A | N/A                                                                                  | N/A |
| 15                              | 45                                                  | 45  | 29                                                 | 28  | 26                                                                                   | 25  |
| 20                              | 31                                                  | 32  | 21                                                 | 20  | 21                                                                                   | 21  |

<sup>a</sup>The left column is the result of the visual test; the right column is the result of the rheological measurement.
